# Supplementary material
Source: publisher figshare collection journal article supplement (https://gsapubs.figshare.com/ndownloader/files/40053526)
Supplement: Supplementary file 1 [file 40053526]

## Sheet: Sheet1
Samples name	GN(n)	Rho-S (105cm-2) (NS)	Pooled 238U (ppm)	Pooled age (Ma) (±1σ)	P(χ2) (%)	Dispersion	Central age (Ma) (±1σ)	L±SD(μm)	No.(n)	Mean Dpar (Range) (μm)
XG-01	28	4.89 (842)	27.43	32.6±2.3	33.18	0.26	35.5±2.2	13.45±2.08	36	3.13
XG-02	35	1.52 (3186)	17.97	160.3±15.3	32.9	0.39	164±11.2	11.54±2.15	120	2.04
XG-12	38	5.53 (943)	22.87	44.5±7.3	24.39	0.46	51.2±4.2	12.68±2.45	43	2.3
WQT-01	30	5.67 (880)	11.9	85.2±9.4	5.26	0.29	95.8±6.3	11.87±1.7	61	2.17
WQT-02	22	1.22 (663)	19.14	122.2±27	61.06	0.42	137.6±18.6	12.34±1.97	70	3.37
